# Supplementary material
Source: MDPI journal article supplement (https://www.mdpi.com/2073-4441/7/9/5061)
Supplement: s1 [file s1]

# Supplementary Materials

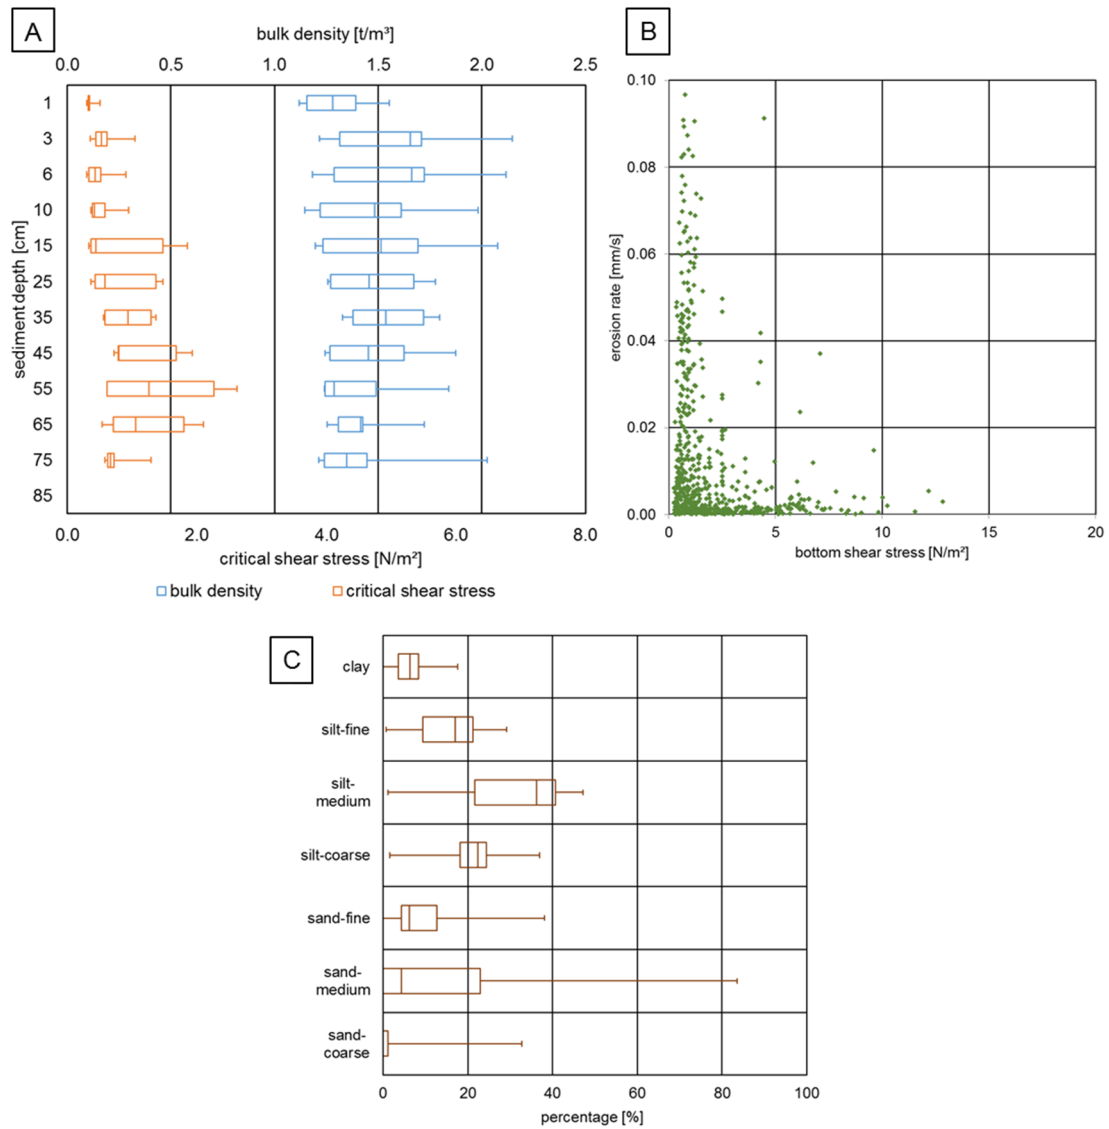

**Figure S1.** (A) Box-plots of measured critical shear stresses and bulk densities including all sampling locations of the River Elbe; (B) Measured erosion rates for a stepwise increase of bottom shear stresses including all sampling locations of the River Elbe; (C) Depth-averaged particle size distributions including all sampling locations of the River Elbe.

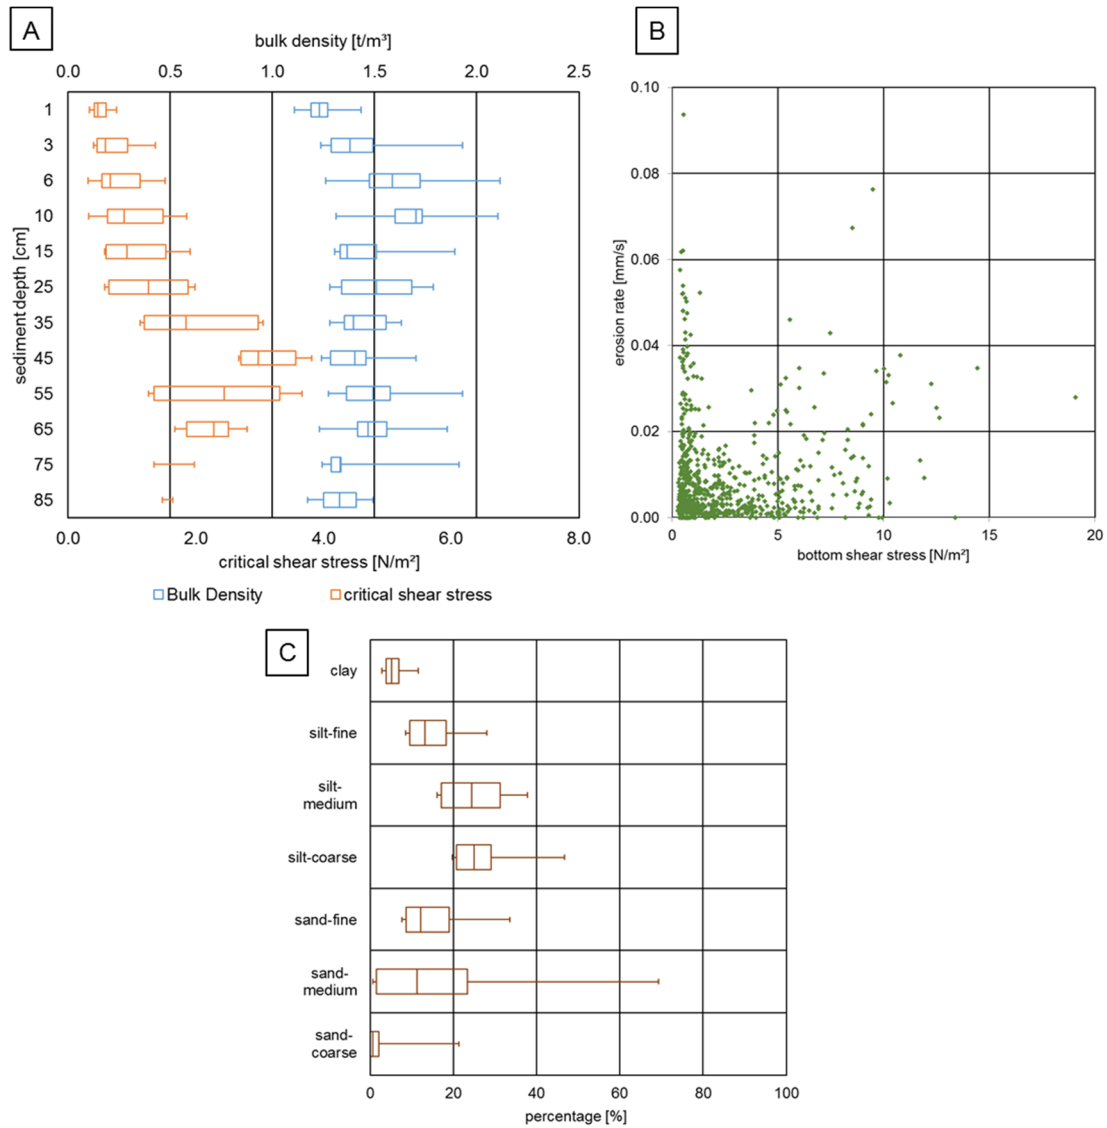

**Figure S2.** (A) Box-plots of measured critical shear stresses and bulk densities including all sampling locations in the catchment of the River Saale; (B) Measured erosion rates for a stepwise increase of bottom shear stresses including all sampling locations in the catchment of the River Saale; (C) Depth-averaged particle size distributions including all sampling locations in the catchment of the River Saale.

© 2015 by the authors; licensee MDPI, Basel, Switzerland. This article is an open access article distributed under the terms and conditions of the Creative Commons Attribution license (<http://creativecommons.org/licenses/by/4.0/>).
